# Supplementary material for: Identification of miRNAs Involved in Reprogramming Acinar Cells into Insulin Producing Cells
Source: PubMed Central journal article supplement (PMC4686894; doi:10.1371/journal.pone.0145116), 2015-12-21

## S2 Figure

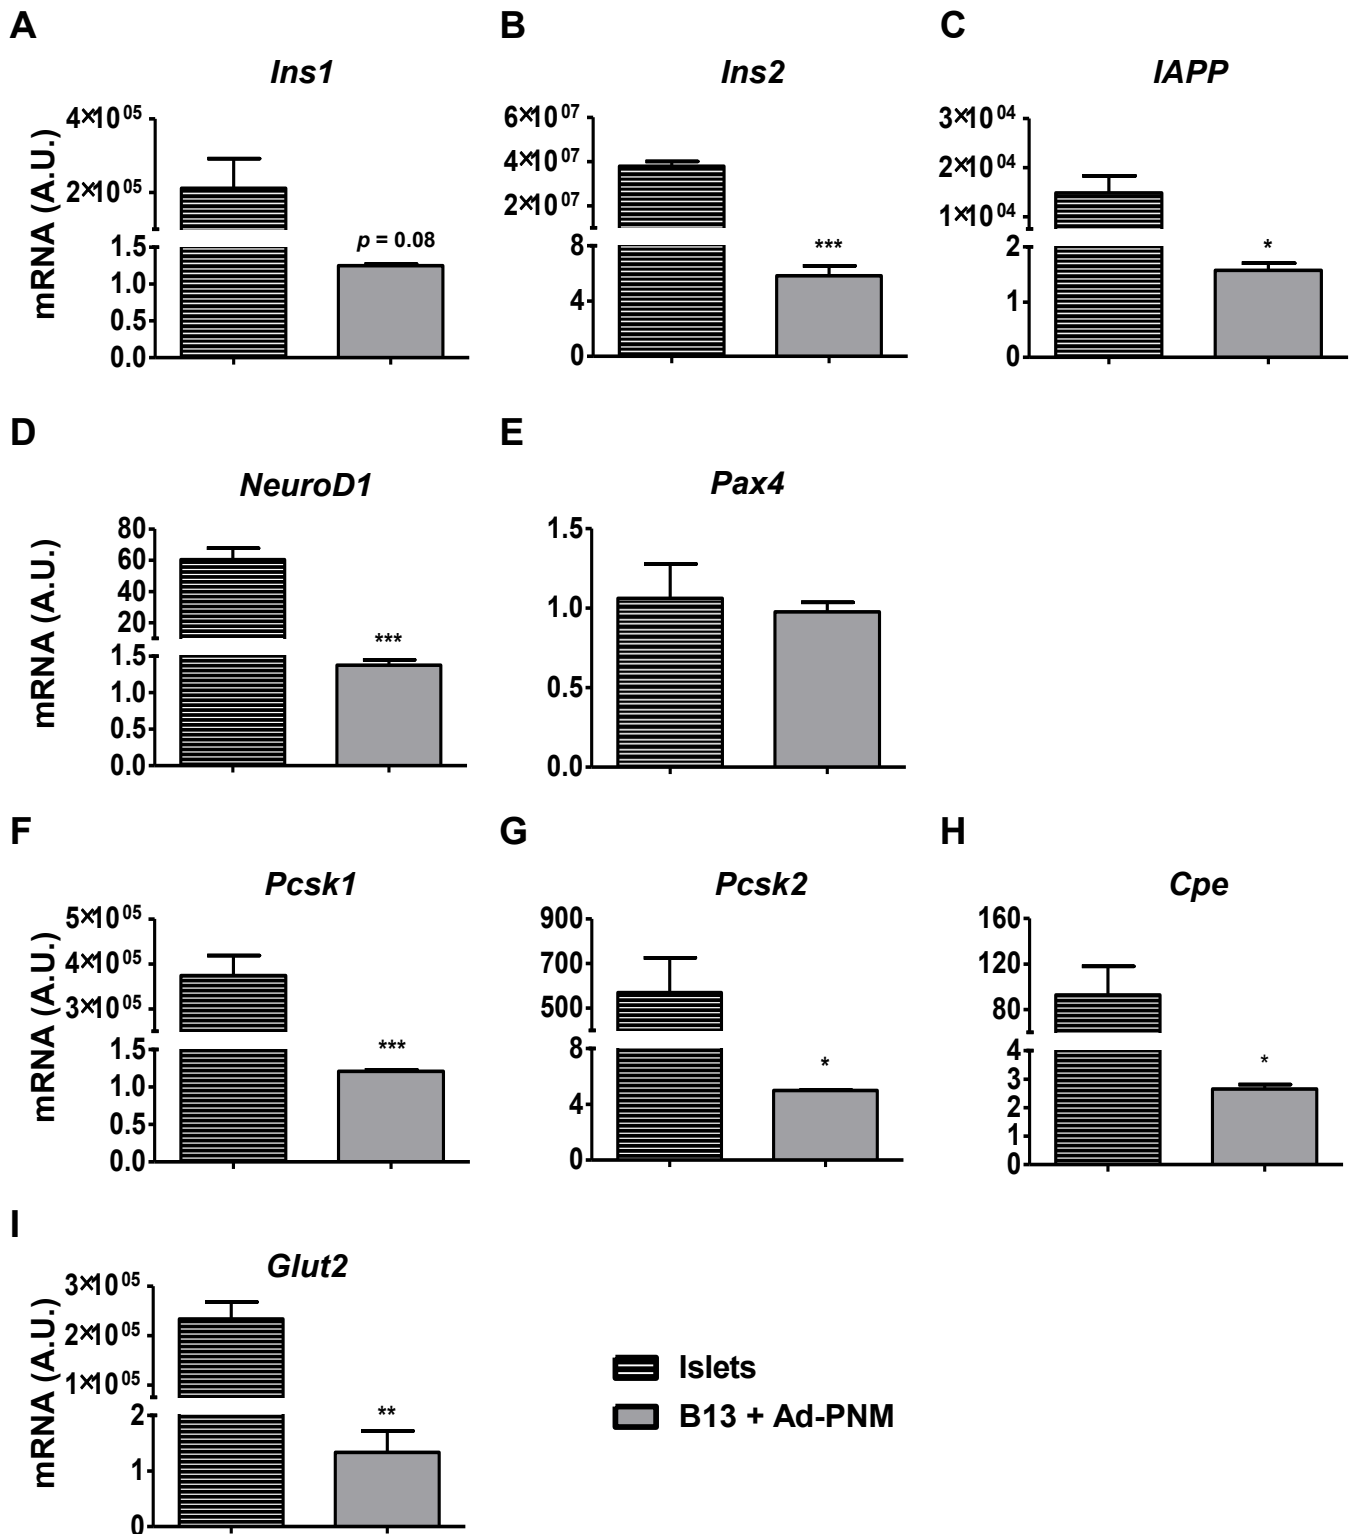

Supplement: pone.0145116.s002.pdf [file pone.0145116.s002.pdf]
