# Supplementary material for: Identification of miRNAs Involved in Reprogramming Acinar Cells into Insulin Producing Cells
Source: PubMed Central journal article supplement (PMC4686894; doi:10.1371/journal.pone.0145116), 2015-12-21
Supplement: pone.0145116.s007.pdf [file pone.0145116.s007.pdf]

**S3 Table. Ct values for differentially expressed miRNAs comparing AR42J cells to B13 cells.** To minimize stochasticity observed at high Ct, values above 35 were considered non-detected (ND). 3 detected values versus  $\geq 2$  ND values were required to receive the label “Detected vs. ND”. NA, not analyzed (because of two Tm values). NV, no value. P values were determined by using Student’s *t* test. n = 3 wells per group.

|                                     |             | AR42J no Ad |      |      | B13 no Ad |      |      |                  |          |
|-------------------------------------|-------------|-------------|------|------|-----------|------|------|------------------|----------|
|                                     | ID sample   | 1           | 2    | 3    | 1         | 2    | 3    | Ratio            | P value  |
| <b>House Keeping</b>                | miR-16-5p   | 23.7        | 23.9 | 23.9 | 24.1      | 23.5 | 23.7 | -                | -        |
| <b>"AR42J no Ad" vs "B13 no Ad"</b> | miR-200c-3p | 24.8        | 24.9 | 24.7 | NV        | NV   | NV   | Detected vs N.D. | -        |
|                                     | miR-141-3p  | 25.7        | 25.7 | 25.8 | 36.8      | NV   | NV   | Detected vs N.D. | -        |
|                                     | miR-141-5p  | 28.8        | 28.7 | 28.8 | NV        | NV   | NV   | Detected vs N.D. | -        |
|                                     | miR-378a-3p | 30.4        | 30.0 | 29.6 | 36.2      | 34.9 | 36.5 | Detected vs N.D. | -        |
|                                     | miR-205-5p  | 30.2        | 30.7 | 30.5 | NV        | NV   | NV   | Detected vs N.D. | -        |
|                                     | miR-149-5p  | 30.7        | 30.5 | 31.4 | NV        | NV   | NV   | Detected vs N.D. | -        |
|                                     | miR-28-5p   | 31.1        | 31.8 | 31.1 | NV        | NV   | NV   | Detected vs N.D. | -        |
|                                     | miR-200b-3p | 31.6        | 31.4 | 32.0 | 34.9      | NV   | NV   | Detected vs N.D. | -        |
|                                     | miR-181b-5p | 33.0        | 32.4 | 32.4 | 36.8      | 35.5 | 36.1 | Detected vs N.D. | -        |
|                                     | miR-200c-5p | 32.4        | 33.0 | 33.0 | NV        | NV   | NV   | Detected vs N.D. | -        |
|                                     | miR-429     | 33.0        | 32.9 | 32.5 | NV        | 34.5 | 35.0 | Detected vs N.D. | -        |
|                                     | miR-200a-3p | 32.5        | 33.6 | 33.4 | 35.7      | NV   | 37.8 | Detected vs N.D. | -        |
|                                     | miR-483-3p  | 27.3        | 27.0 | 27.5 | 31.9      | 31.2 | 31.8 | 21.84            | 0.0004   |
|                                     | miR-28-3p   | 31.2        | 31.1 | 31.8 | 34.3      | NA   | 34.8 | 8.48             | 0.0129   |
|                                     | miR-34a-5p  | 25.8        | 25.8 | 25.9 | 28.2      | 27.6 | 28.3 | 4.8              | < 0.0001 |
|                                     | let-7i-5p   | 26.6        | 26.5 | 26.4 | 29.4      | 28.2 | 28.4 | 4.57             | 0.0007   |
|                                     | miR-181a-5p | 30.0        | 30.1 | 30.4 | 32.6      | 31.4 | 32.5 | 4.21             | 0.0002   |
|                                     | let-7i-3p   | 32.4        | 32.8 | 32.7 | 34.9      | 33.9 | NV   | 4.17             | 0.0004   |
|                                     | miR-192-5p  | 26.0        | 26.0 | 26.2 | 27.7      | 27.3 | 28.0 | 3.09             | 0.0004   |
|                                     | miR-30a-5p  | 27.0        | 26.8 | 27.0 | 28.8      | 28.0 | 28.2 | 2.89             | 0.0006   |
|                                     | miR-194-5p  | 27.1        | 27.3 | 27.1 | 29.1      | 28.2 | 28.5 | 2.86             | 0.0004   |
|                                     | miR-347     | 27.7        | 27.6 | 28.3 | 29.8      | 28.4 | 29.7 | 2.79             | 0.0152   |
|                                     | miR-122-5p  | 28.0        | 28.1 | 27.9 | 29.9      | 28.9 | 29.3 | 2.69             | 0.0012   |
|                                     | miR-374-5p  | 30.1        | 30.5 | 30.1 | 31.6      | 31.2 | 31.6 | 2.54             | 0.0038   |
|                                     | miR-30a-3p  | 28.2        | 28.6 | 28.8 | 30.3      | 29.3 | 29.7 | 2.47             | 0.0016   |
|                                     | let-7b-5p   | 24.6        | 24.8 | 24.4 | 26.4      | 25.2 | 25.7 | 2.42             | 0.0041   |
| let-7g-5p                           | 24.7        | 24.7        | 24.6 | 26.2 | 25.4      | 25.8 | 2.34 | 0.0005           |          |
| miR-361-5p                          | 29.4        | 28.9        | 29.1 | 30.5 | 30.1      | 30.1 | 2.32 | 0.0103           |          |
| miR-204-5p                          | 27.4        | 27.3        | 27.1 | 28.6 | 28.1      | 28.4 | 2.32 | 0.0038           |          |
| miR-497-5p                          | 26.6        | 26.5        | 26.9 | 28.1 | 27.4      | 27.8 | 2.22 | 0.0015           |          |
| let-7d-5p                           | 26.5        | 26.4        | 26.2 | 27.8 | 27.2      | 27.2 | 2.18 | 0.0078           |          |

|                                             |             |      |      |      |      |      |      |                     |          |
|---------------------------------------------|-------------|------|------|------|------|------|------|---------------------|----------|
|                                             | miR-500-3p  | 32.9 | 33.5 | 34.0 | 34.3 | 34.4 | 34.8 | 2.13                | 0.0574   |
|                                             | miR-125b-5p | 27.6 | 27.7 | 27.9 | 28.9 | 28.6 | 28.6 | 2.08                | 0.0001   |
|                                             | miR-181d-5p | 31.4 | 31.1 | 31.2 | 32.9 | 31.9 | 31.8 | 2.06                | 0.0105   |
|                                             | miR-26b-5p  | 29.6 | 29.6 | 29.9 | 31.0 | 30.4 | 30.5 | 2.03                | 0.0007   |
|                                             | miR-421-3p  | 32.9 | 32.6 | 33.4 | 34.4 | 33.2 | 34.1 | 2.02                | 0.0511   |
| <b>"B13 no Ad"<br/>vs "AR42J<br/>no Ad"</b> | miR-325-3p  | 34.7 | 35.1 | 36.6 | 29.1 | 28.3 | 28.9 | Detected vs<br>N.D. | -        |
|                                             | miR-325-5p  | 35.2 | NV   | NV   | 31.1 | 29.9 | 29.9 | Detected vs<br>N.D. | -        |
|                                             | miR-92b-3p  | NV   | NV   | NV   | 33.8 | 32.3 | 32.9 | Detected vs<br>N.D. | -        |
|                                             | miR-142-3p  | 34.8 | 36.6 | 35.5 | 33.5 | 33.8 | 33.6 | Detected vs<br>N.D. | -        |
|                                             | miR-137-3p  | 38.8 | 38.1 | 38.7 | 34.5 | 33.5 | 33.7 | Detected vs<br>N.D. | -        |
|                                             | miR-27a-5p  | 36.5 | 35.0 | 35.1 | 34.3 | 33.9 | 34.4 | Detected vs<br>N.D. | -        |
|                                             | miR-330-3p  | 33.1 | 32.9 | 33.7 | 31.1 | 30.1 | 30.0 | 6.8                 | 0.0039   |
|                                             | miR-101a-3p | 30.0 | 30.0 | 30.4 | 28.4 | 27.8 | 28.2 | 3.75                | < 0.0001 |
|                                             | miR-301a-5p | 34.0 | 34.0 | NV   | 32.9 | 32.1 | 32.5 | 3.55                | 0.0008   |
|                                             | miR-328a-3p | 30.1 | 29.9 | 30.3 | 28.8 | 27.5 | 28.3 | 3.52                | 0.0082   |
|                                             | miR-301a-3p | 29.0 | 29.1 | 29.0 | 27.6 | 26.8 | 27.2 | 3.31                | < 0.0001 |
|                                             | miR-455-3p  | 31.0 | 30.9 | 31.1 | 30.2 | 28.9 | 29.0 | 3.07                | 0.0183   |
|                                             | miR-31a-3p  | 29.3 | 29.2 | 29.9 | 28.3 | 27.5 | 27.9 | 2.81                | 0.0003   |
|                                             | miR-193-5p  | 32.1 | 33.1 | 32.3 | 31.9 | 30.3 | 30.9 | 2.57                | 0.0339   |
|                                             | miR-2137    | 29.0 | 28.8 | 29.6 | 28.1 | 27.2 | 27.7 | 2.57                | 0.0012   |
|                                             | miR-1839-5p | 30.9 | 30.6 | 30.4 | 29.9 | 28.5 | 29.2 | 2.55                | 0.0246   |
|                                             | miR-106b-5p | 25.7 | 25.6 | 25.7 | 24.6 | 23.9 | 24.2 | 2.53                | < 0.0001 |
|                                             | miR-7a-5p   | 27.0 | 27.0 | 26.8 | 26.6 | 25.2 | 25.3 | 2.3                 | 0.038    |
|                                             | miR-153-3p  | 29.6 | 29.5 | 30.1 | 28.7 | 28.3 | 28.4 | 2.25                | 0.0016   |
|                                             | miR-365-3p  | 29.1 | 28.4 | 28.4 | 27.6 | 27.2 | 27.4 | 2.19                | 0.0033   |
| miR-25-3p                                   | 26.0        | 26.0 | 26.1 | 25.1 | 24.5 | 25.0 | 2.15 | 0.0003              |          |
| miR-29a-5p                                  | 29.9        | 30.0 | 29.9 | 29.2 | 28.3 | 29.0 | 2.09 | 0.0055              |          |
| miR-31a-5p                                  | 25.7        | 25.6 | 25.7 | 24.7 | 24.2 | 24.7 | 2.07 | 0.0012              |          |
